# Supplementary material
Source: Springer Nature journal article supplement (https://www.springermedizin.de/resource/supplementary/12967_2006_167_MOESM6_ESM.pdf/9575994)

Relative Copy Number

10000  
1000  
100  
10  
1

GAPDH TLR9 TLR8 TLR7 TLR6 TLR5 TLR4 TLR3 TLR10 TLR1 MYD88 IRF7

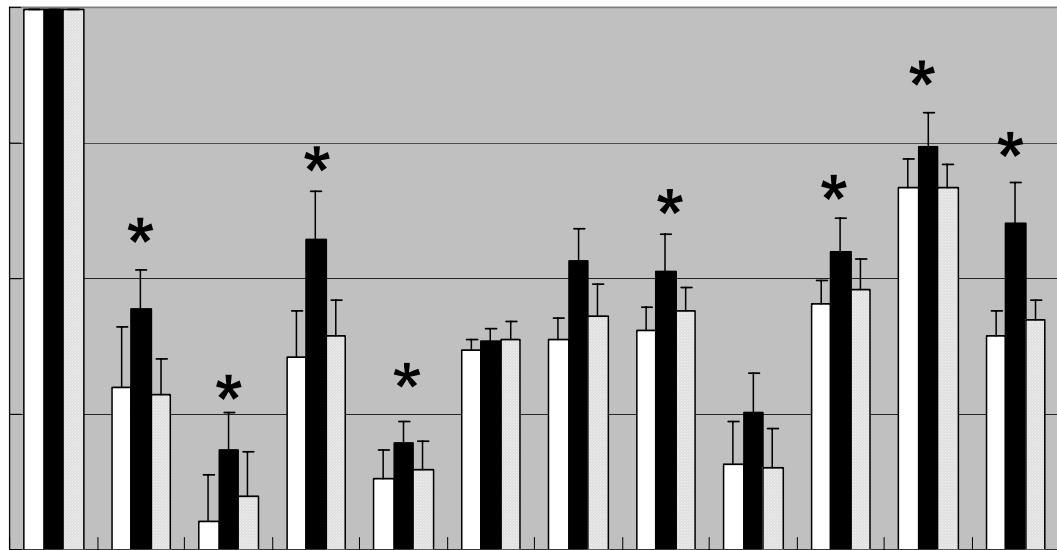

Supplement: MOESM6 [file 9575994]
